# Supplementary material for: Management of asymptomatic severe aortic stenosis: a systematic review and meta-analysis
Source: HighWire-hosted journal article supplement (doi:10.1136/openhrt-2022-001982), 2022-05-01
Supplement: openhrt-2022-001982supp001_data_supplement.pdf [file openhrt-2022-001982supp001_data_supplement.pdf]

## Management of asymptomatic severe aortic stenosis: A systematic review and meta-analysis

Vasiliki Tsampasian<sup>1,2</sup>, Ciaran Grafton-Clarke<sup>1,2</sup>, Abraham Edgar Gracia Ramos<sup>3</sup>, George Asimakopoulos<sup>4</sup>, Pankaj Garg<sup>1,2</sup>, Sanjay K Prasad<sup>4</sup>, Liam Ring<sup>5</sup>, Gerry McCann<sup>6</sup>, James H F Rudd<sup>7</sup>, Marc R Dweck<sup>8</sup>, Vassilios S Vassiliou<sup>1,2</sup>

### Supplementary Material

**Supplementary Figure 1.** PRISMA flow diagram of the study selection process.

**Supplementary Figure 2.** Meta-analysis of AVATAR and RECOVERY trials focusing on cardiovascular death. No statistically significant differences were seen between the two treatment groups.

**Supplementary Figure 3.** Funnel plot for risk of all-cause mortality as derived from the eight observational studies demonstrating no evidence of significant publication bias

**Supplementary Table 1.** Cochrane Collaboration's tool for assessing risk of bias in randomised controlled trials

**Supplementary Table 2.** Number of events in each randomised controlled trial

**Supplementary Table 3.** Newcastle-Ottawa Scale for non-randomised clinical trials

**Supplementary Figure 1.** PRISMA flow diagram of the study selection process.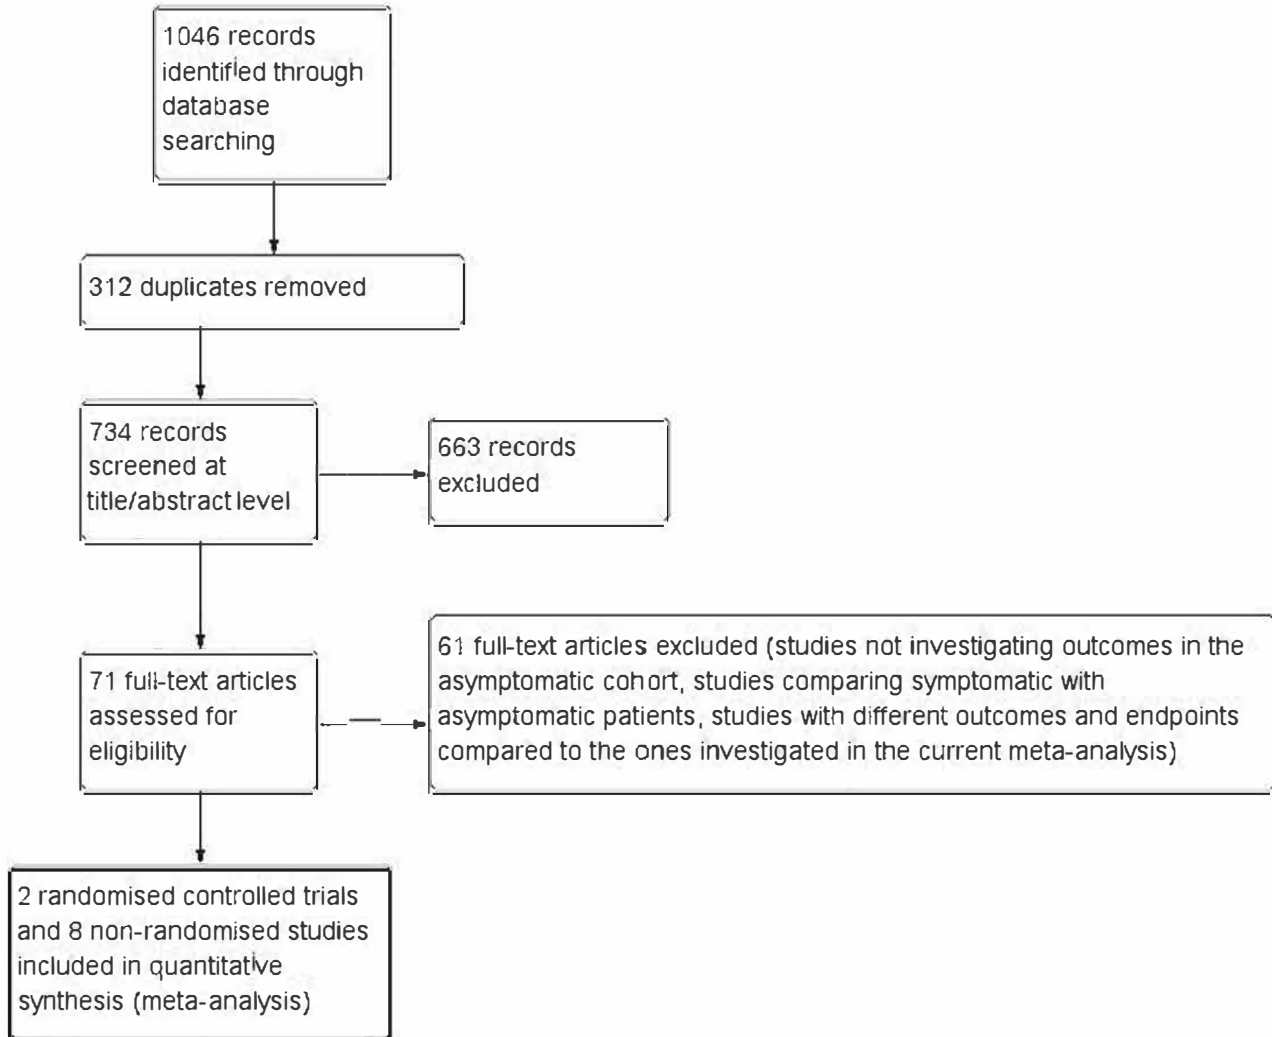

**Supplementary Figure 2.** Meta-analysis of AVATAR and RECOVERY trials focusing on cardiovascular death. No statistically significant differences were seen between the two treatment groups.

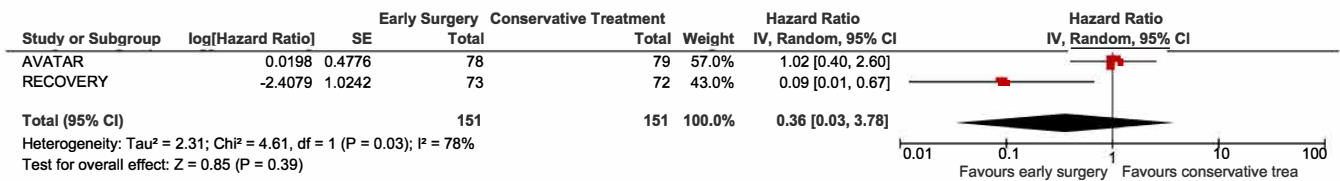

**Supplementary Figure 3.** Funnel plot for risk of all-cause mortality as derived from the eight observational studies demonstrating no evidence of significant publication bias

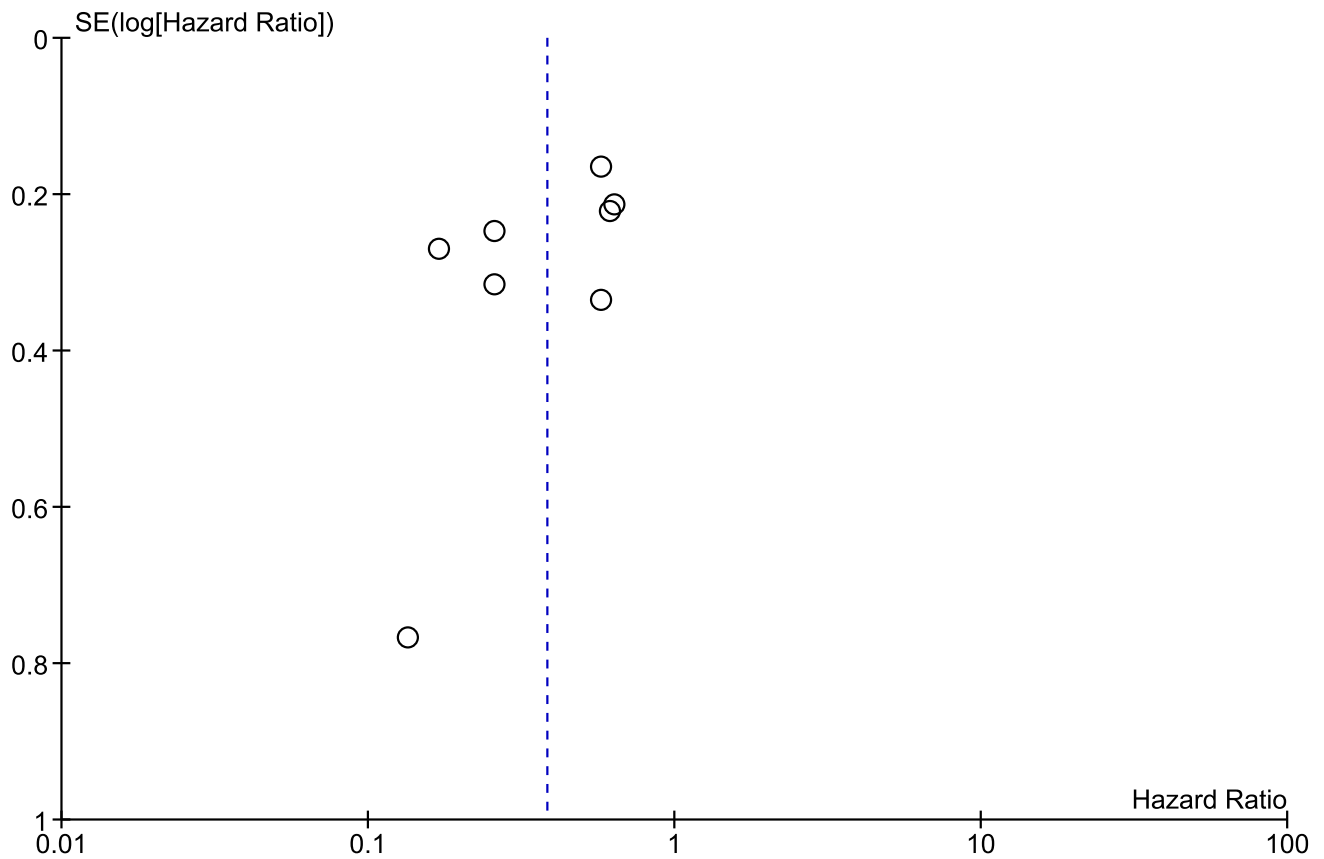

**Supplementary Table 1.** Cochrane Collaboration's tool for assessing risk of bias in randomised controlled trials

| <b>Trial</b>    | <b>Sequence generation</b> | <b>Allocation concealment</b> | <b>Performance bias</b> | <b>Detection bias</b> | <b>Attrition bias</b> | <b>Reporting bias</b> |
|-----------------|----------------------------|-------------------------------|-------------------------|-----------------------|-----------------------|-----------------------|
| <b>AVATAR</b>   | Low                        | Low                           | Low                     | Low                   | Low                   | Low                   |
| <b>RECOVERY</b> | Low                        | Low                           | Low                     | Low                   | Low                   | Low                   |

**Supplementary Table 2.** Number of events in each randomised controlled trial

|                                        | AVATAR        |                   | RECOVERY      |                   |
|----------------------------------------|---------------|-------------------|---------------|-------------------|
|                                        | Early surgery | Conservative care | Early surgery | Conservative care |
| All-cause death - No (%)               | 9 (11.5%)     | 16 (20.2%)        | 5 (6.8%)      | 15 (20.8%)        |
| Heart failure hospitalisation - No (%) | 1 (1.2%)      | 7 (8.8%)          | 0 (0%)        | 8 (11.1%)         |
| Myocardial infarction - No (%)         | 1 (1.2%)      | 2 (2.5%)          | 0 (0%)        | 1 (1.4%)          |
| Stroke - No (%)                        | 2 (2.5%)      | 1 (1.2%)          | 1 (1.3%)      | 3 (4.2%)          |

**Supplementary Table 3.** Newcastle-Ottawa Scale for non-randomised clinical trials

| <b>Study</b>                      | <b>Selection</b> | <b>Comparability</b> | <b>Outcome</b> | <b>Total</b> | <b>Quality of study</b> |
|-----------------------------------|------------------|----------------------|----------------|--------------|-------------------------|
| <b>Pai</b>                        | ****             | *                    | **             | 7            | High                    |
| <b>Kang</b>                       | ****             | *                    | ***            | 8            | High                    |
| <b>Le Tourneau</b>                | ****             | **                   | **             | 7            | High                    |
| <b>Taniguchi<br/>(CURRENT AS)</b> | ****             | **                   | ***            | 9            | High                    |
| <b>Masri</b>                      | ***              | *                    | ***            | 7            | High                    |
| <b>Bohbot</b>                     | ****             | *                    | ***            | 8            | High                    |
| <b>Campo</b>                      | ****             | *                    | **             | 7            | High                    |
| <b>Kim</b>                        | ****             | *                    | ***            | 8            | High                    |
